# Supplementary material for: A one-step hydrothermal method for novel Cu–Co bimetallic sulfides to improve the power performance of microbial fuel cells
Source: Royal Society of Chemistry journal article supplement (doi:10.1039/d4nj05356g), 2025-01-01
Supplement: d4nj05356g1.pdf [file d4nj05356g1.pdf]

## Supplementary data

### **One-step hydrothermal method for novel Cu-Co bimetallic sulfides to improve the power performance of microbial fuel cells**

*Xuan Yang<sup>1,2,3</sup>, Cong Li<sup>1,2,3</sup>, Cheng Li<sup>1,2,3</sup>, Jinrong Lu<sup>4</sup>, Chenxin Wang<sup>1,2,3</sup>, Hua Liu<sup>1,2,3,\*</sup>, Zhi Song<sup>1,2,3,\*</sup>*

*(<sup>1</sup> Chemical Science and Engineering College, North Minzu University, Yinchuan, 750021, PR China*

*<sup>2</sup> Ningxia Key Laboratory of Solar Chemical Conversion Technology, North Minzu University, Yinchuan, 750021, PR China*

*<sup>3</sup> Key Laboratory for Chemical Engineering and Technology, State Ethnic Affairs Commission, North Minzu University, Yinchuan, 750021, PR China*

*<sup>4</sup> Institute of Engineering Thermophysics, School of Energy and Power Engineering, Chongqing University, Chongqing, 400044, China)*

Corresponding author: [3181947@qq.com](mailto:3181947@qq.com) (H.Liu),

[songzhi891010@163.com](mailto:songzhi891010@163.com) (Z.Song)

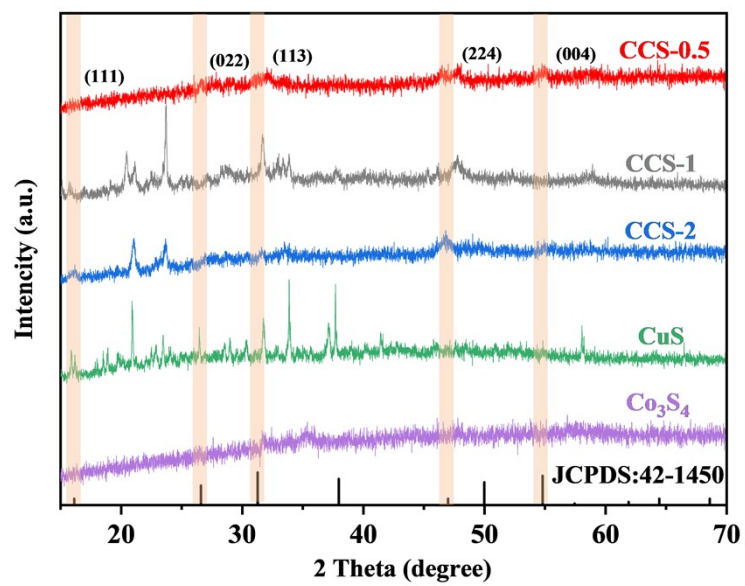

Fig S1 XRD patterns of the five catalysts

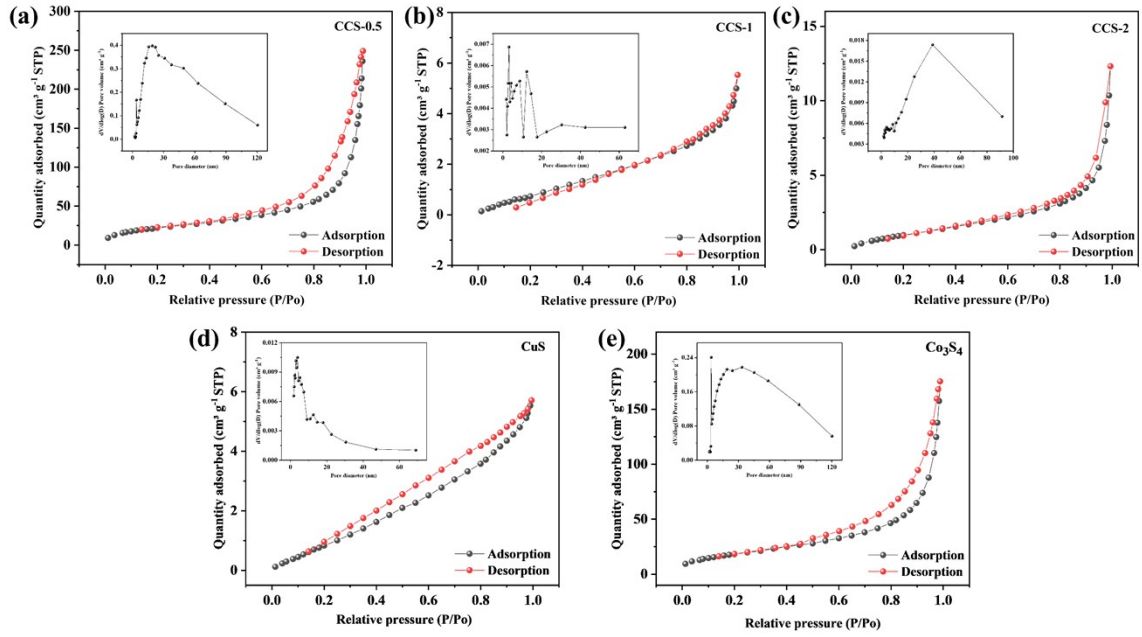

**Fig. S2:** (a) Nitrogen adsorption-desorption isotherms and pore size distribution of CCS-0.5, (b) Nitrogen adsorption-desorption isotherms and pore size distribution of CCS-1, (c) Nitrogen adsorption-desorption isotherms and pore size distribution of CCS-2, (d) Nitrogen adsorption-desorption isotherms and pore size distribution of CuS, (e) Nitrogen adsorption-desorption isotherms and pore size distribution of Co<sub>3</sub>S<sub>4</sub>.

**Table S1.** ICP-MS results of different ratios of CCS-M

| Sample  | Cu/Co ratio in catalysts |
|---------|--------------------------|
| CCS-0.5 | 0.58                     |
| CCS-1   | 1.48                     |
| CCS-2   | 2.61                     |

**Table S2.** BET surface area ( $S_{\text{BET}}$ ), total pore volume ( $V_{\text{total}}$ ) and average pore diameter (APD) of different materials.

| Catalyst                | $S_{\text{BET}}$ ( $\text{m}^2 \text{g}^{-1}$ ) | $V_{\text{total}}$ ( $\text{cm}^3 \text{g}^{-1}$ ) | APD (nm) |
|-------------------------|-------------------------------------------------|----------------------------------------------------|----------|
| CCS-0.5                 | 82.67                                           | 0.39                                               | 15.77    |
| CCS-1                   | 3.89                                            | 0.0082                                             | 6.08     |
| CCS-2                   | 4.44                                            | 0.019                                              | 13.20    |
| CuS                     | 5.73                                            | 0.087                                              | 4.41     |
| $\text{Co}_3\text{S}_4$ | 68.91                                           | 0.27                                               | 12.97    |

**Table S3.** Exchange current density derived from Tafel curve fitting.

| Cathode                        | Linear equation  | R <sup>2</sup> | i <sub>0</sub> (×10 <sup>-5</sup> A cm <sup>-2</sup> ) |
|--------------------------------|------------------|----------------|--------------------------------------------------------|
| CCS-0.5                        | y=6.7817x-3.4969 | 0.9914         | 31.85                                                  |
| CCS-1                          | y=5.6391x-4.1951 | 0.9927         | 6.38                                                   |
| CCS-2                          | y=6.2018x-3.8905 | 0.9826         | 12.87                                                  |
| CuS                            | y=1.3714x-3.9894 | 0.9828         | 10.25                                                  |
| Co <sub>3</sub> S <sub>4</sub> | y=4.3206x-5.9453 | 0.9989         | 0.11                                                   |
